# Supplementary material
Source: MDPI journal article supplement (https://www.mdpi.com/1424-2818/12/1/26)
Supplement: s1 [file s1]

# Snapshot of macroalgae and fish assemblages in temperate reefs in the Southern European Atlantic ecoregion

João N Franco <sup>1,2, \*</sup>, Francisco Arenas <sup>1</sup>, Isabel Sousa Pinto <sup>1,3</sup> and Carmen B. de los Santos <sup>4</sup>

<sup>1</sup> CIIMAR/CIMAR - Interdisciplinary Centre of Marine and Environmental Research, University of Porto, Portugal

<sup>2</sup> MARE—Marine and Environmental Sciences Centre, ESTM, Instituto Politécnico de Leiria, 2520-620 Peniche, Portugal

<sup>3</sup> FCUP - Faculty of Sciences, Department of Biology, University of Porto, Portugal

<sup>4</sup> CCMAR - Center of Marine Sciences of Algarve, University of Algarve, Portugal

\* Correspondence: joaonunofranco@gmail.com

## 1. *In situ* measurements of abiotic data

### 1.1 Methods

Seawater temperature (°C) and relative light or illuminance (lux) at each location were measured using HOBO Pendant® Temperature/Light logger at 1 min intervals during the time the biological sampling took, being approximately 40 min [1]. The loggers were deployed above sea surface (0.5 m) and into to a vertical cable at two constant depths (-2 and -25 m). Illuminance reaching depths of 2 and 25 m was expressed as % of superficial illuminance, and temperature was given as a range from the shallow (2 m) to the deep (25 m) measurements.

Replicated (n = 6) water samples were collected approximately 1 m above the reef bottom, transported to the surface and immediately filtered and stored on ice until return to land. Samples were then frozen (-20 °C) until chemical analysis for NO<sub>3</sub><sup>-</sup> and PO<sub>4</sub><sup>3-</sup>, which was performed through a colorimetric auto-analyser (Skalar® SAN Plus Segmented Flow Analyser). Nutrient concentrations (μmol L<sup>-1</sup>) were given as range across the replicates.

### 1.2. Results

Seawater was slightly colder in Parcel than in Tarifa, with temperature values between 2 and 25 m depth ranging from 17.7 °C to 13.5 °C in Parcel (range 4.2 °C) and from 19.4 °C to 15.8 °C in Tarifa (range 3.6 °C) (**Figure S1a**). Water transparency was higher in Tarifa than in Parcel, with a percentage illuminance, in respect to the illuminance recorded above sea surface, between 50% at 2 m and 27% at 25 m in Tarifa and between 38% and 18% in Parcel (**Figure S1b**). The NO<sub>3</sub><sup>-</sup> concentration was higher in Parcel (9.00 to 10.88 μmol L<sup>-1</sup>) than in Tarifa (4.98 to 6.13 μmol L<sup>-1</sup>), while PO<sub>4</sub><sup>3-</sup> concentration was similar between locations (**Figure S1c, d**).

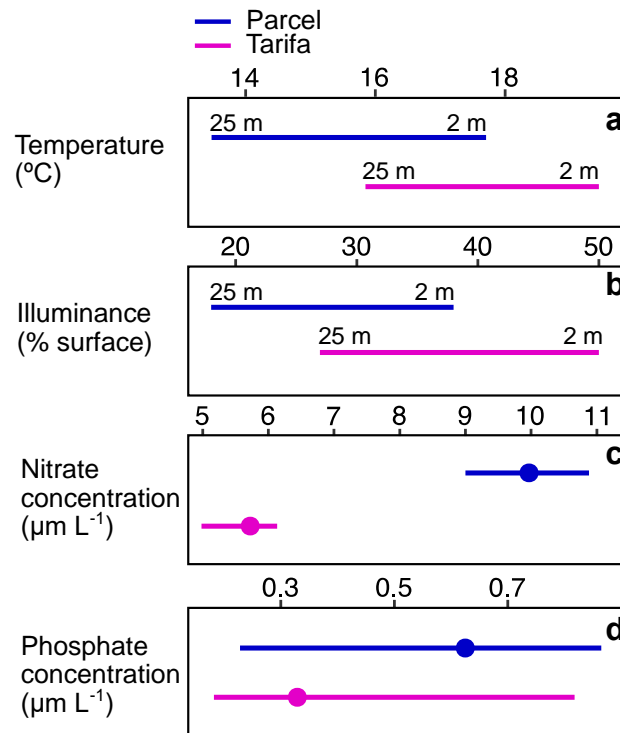

**Figure S1.** Abiotic characterization of Parcel and Tarifa at the moment of the sampling. Seawater temperature (a, range of means) and percentage illuminance (b, range of means) at 2 and 25 m depth (in respect of above seawater surface illuminance), and mean and range of nitrate (c) and phosphate (d) concentrations in the seawater above the reef bottom (~25 m).

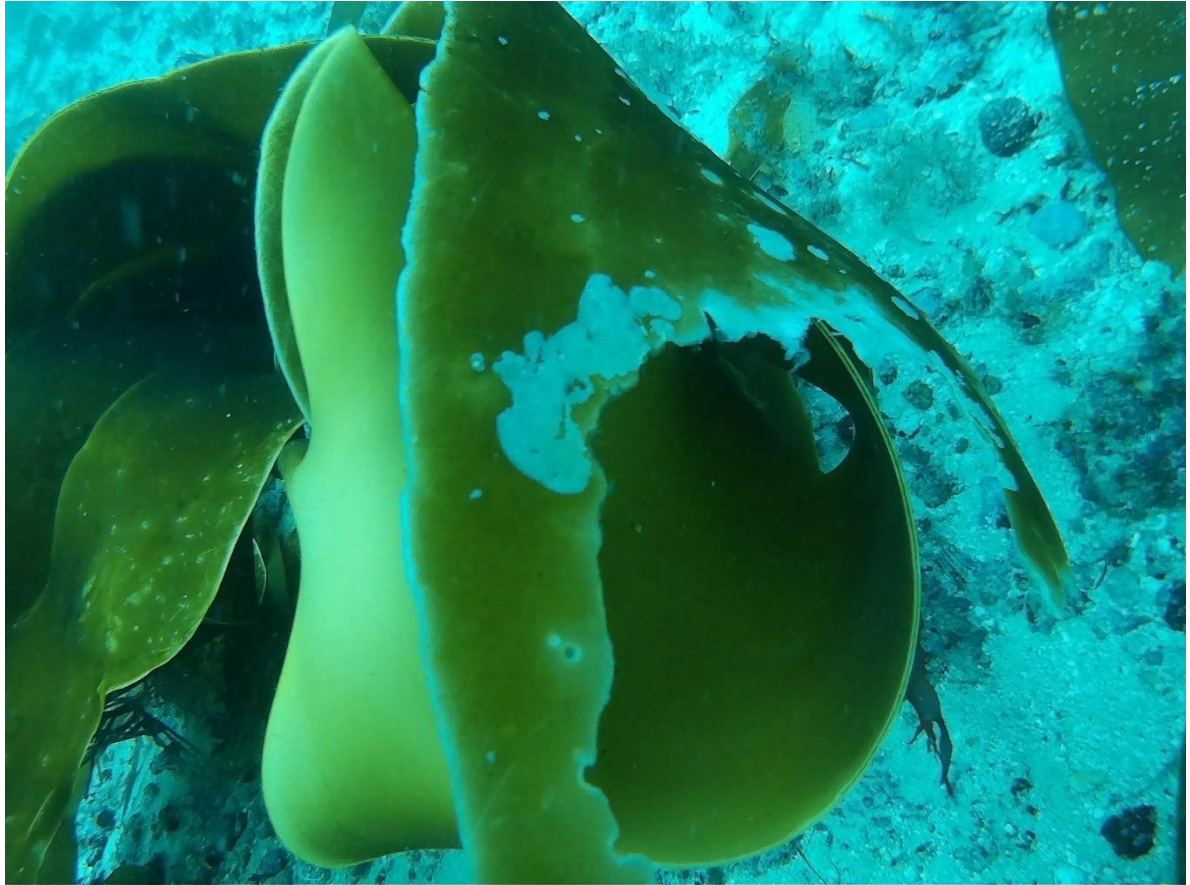

**Figure S2.** Herbivory marks on the golden kelp *Laminaria ochroleuca* at the southernmost sampling site, Tarifa, South of Spain

#### References

1. Franco, J.N.; Wernberg, T.; Bertocci, I.; Jacinto, D.; Maranhão, P.; Pereira, T.; Martinez, B.; Arenas, F.; Sousa-Pinto, I.; Tuya, F. Modulation of different kelp life stages by herbivory: compensatory growth versus population decimation. *Mar. Biol.* **2017**, *164*.
